# Supplementary material
Source: Springer Nature journal article supplement (https://www.springermedizin.de/resource/supplementary/12936_2008_732_MOESM4_ESM.pdf/9548116)

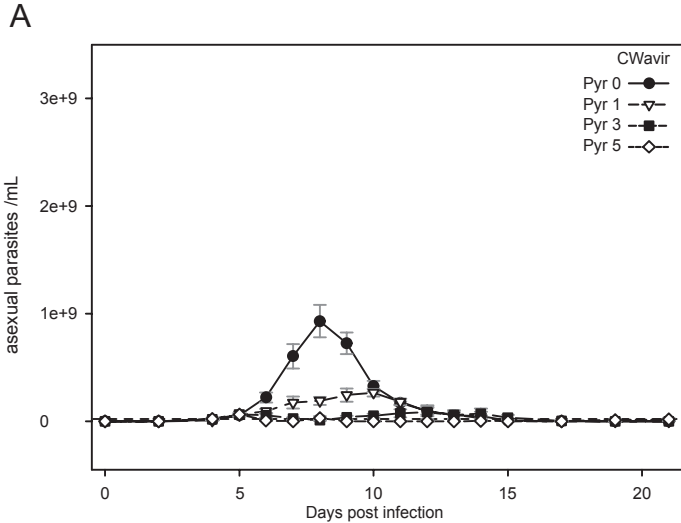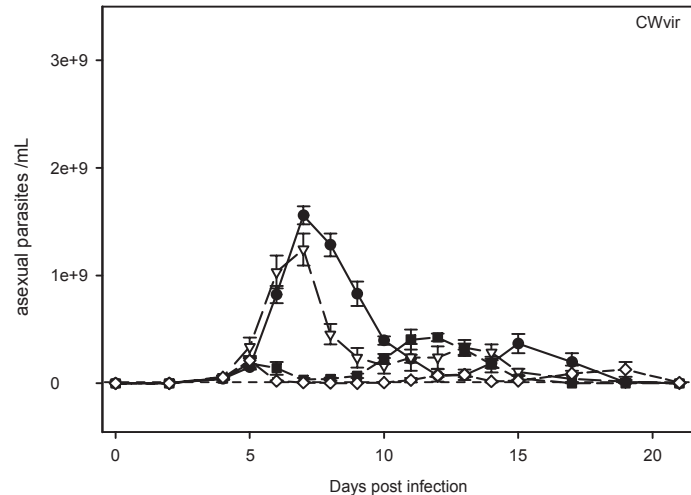

|         |   |   |   |   |   |   |   |   |   |   |   |   |   |   |   |   |   |   |   |   |   |
|---------|---|---|---|---|---|---|---|---|---|---|---|---|---|---|---|---|---|---|---|---|---|
| Pyr 0 ● | 9 | . | . | . | . | . | . | 8 | 4 | . | . | . | . | . | . | . | . | . | . | 4 |   |
| Pyr 1 ▽ | 9 | . | . | 8 | . | 7 | . | . | . | . | . | . | . | . | . | . | . | . | . | . | 7 |
| Pyr 3 ■ | 9 | . | . | . | . | . | . | . | . | . | . | . | . | . | . | . | . | . | . | . | 9 |
| Pyr 5 ◇ | 8 | . | . | . | . | . | . | . | . | . | . | . | . | . | . | . | . | . | . | . | 8 |

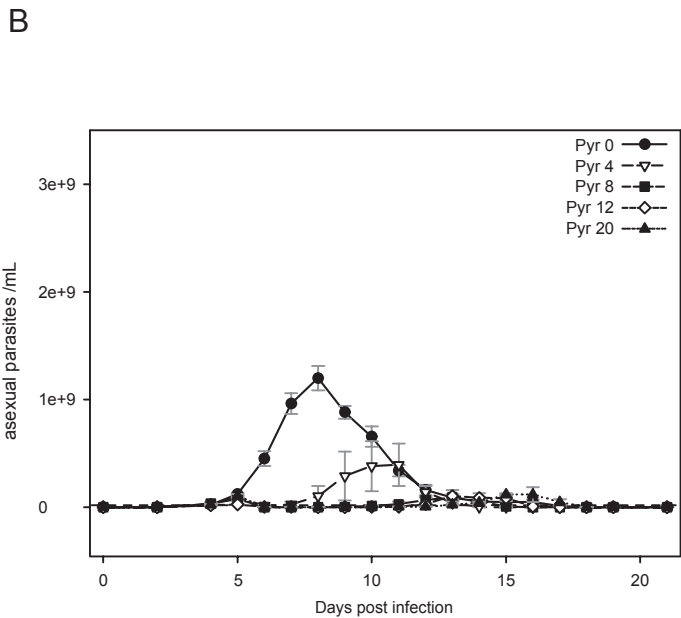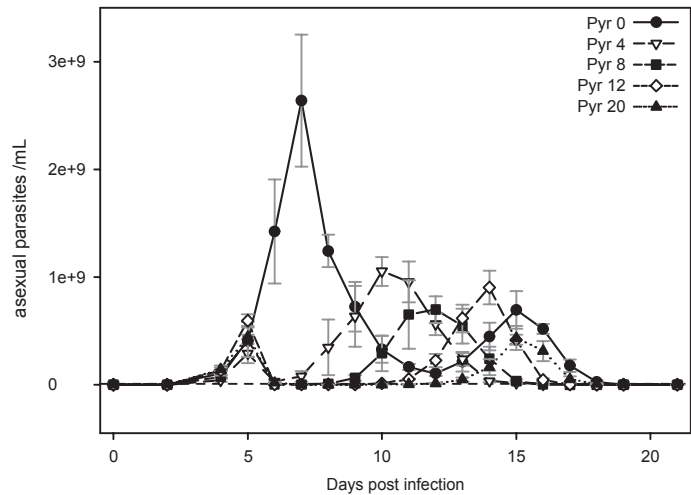

Supplement: MOESM4 [file 9548116]
